# Supplementary material
Source: PubMed Central journal article supplement (PMC3464069)
Supplement: Supp_Fig2.pdf [file Supp_Fig2.pdf]

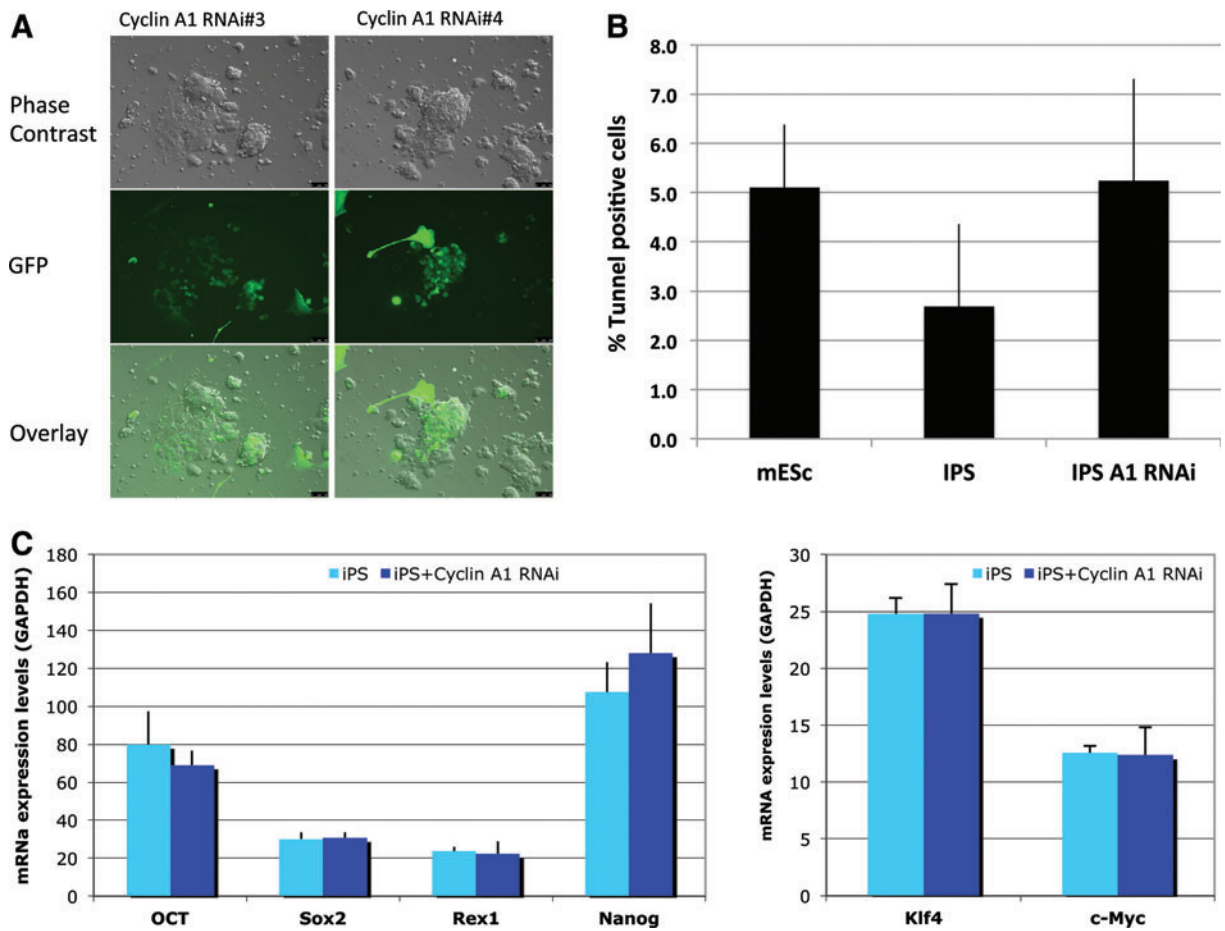

**SUPPLEMENTARY FIG. S2.** (A) GFP-tagged cyclin A1 knockdown and measurement of apoptosis and pluripotency markers. Confocal photographs of phase contrast, green fluorescent protein (GFP), and overlap of mouse iPS cells following infection with lentivirus cyclin A1 RNAi construct numbers 3 and 4, demonstrating >70% infection of cells. (B) Graph summarizing tunnel (apoptosis) in mouse teratomas with the condition described in the figure. (C) Graph of the real-time polymerase chain reaction analysis of mRNA expression of 6 pluripotency genes in 2 iPS clones compared to ESCs.
